# Supplementary material for: Targeting Myeloperoxidase Activity and Neutrophil ROS Production to Modulate Redox Process: Effect of Ellagic Acid and Analogues
Source: MDPI journal article supplement (doi:10.3390/molecules28114516), 2023-06-02
Supplement: s1 [file s1]

Fig. S1A

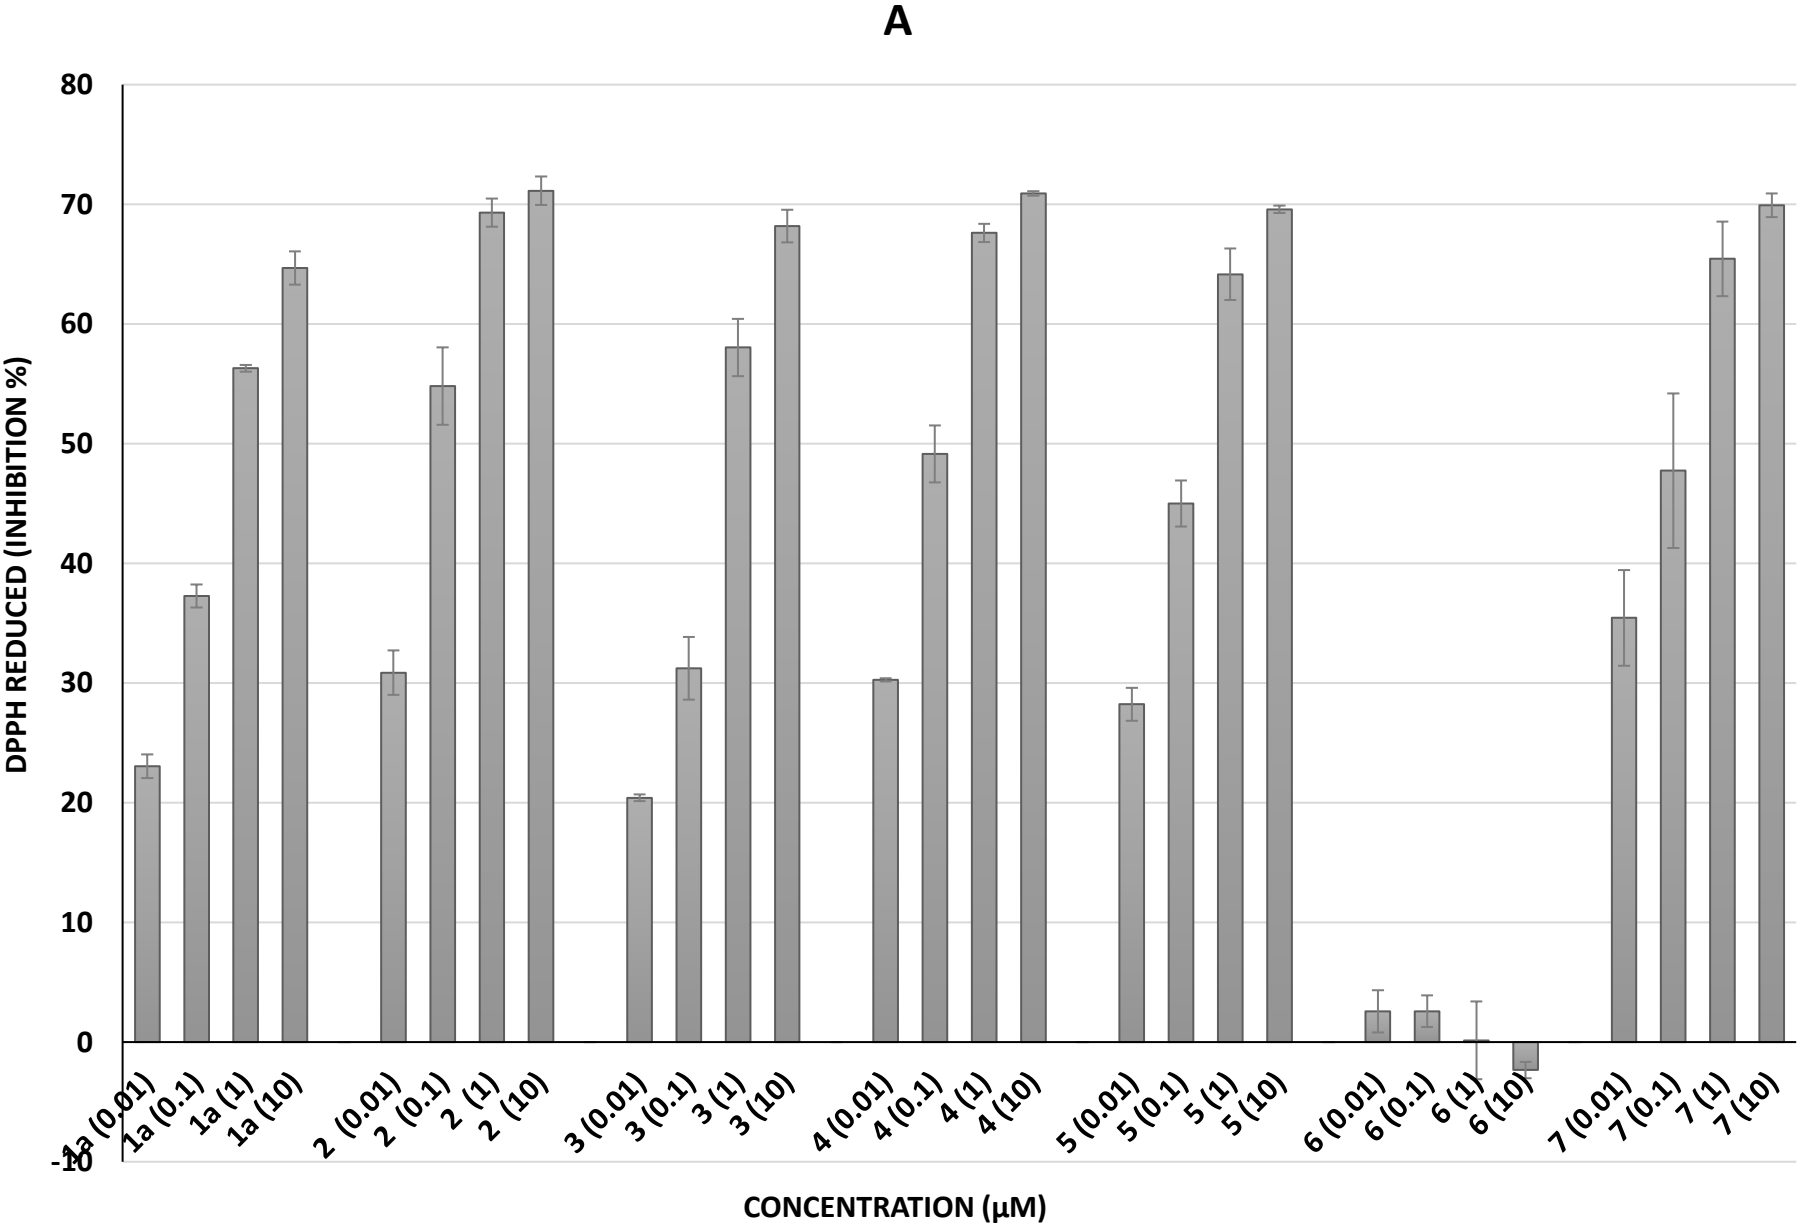

Fig. S1B

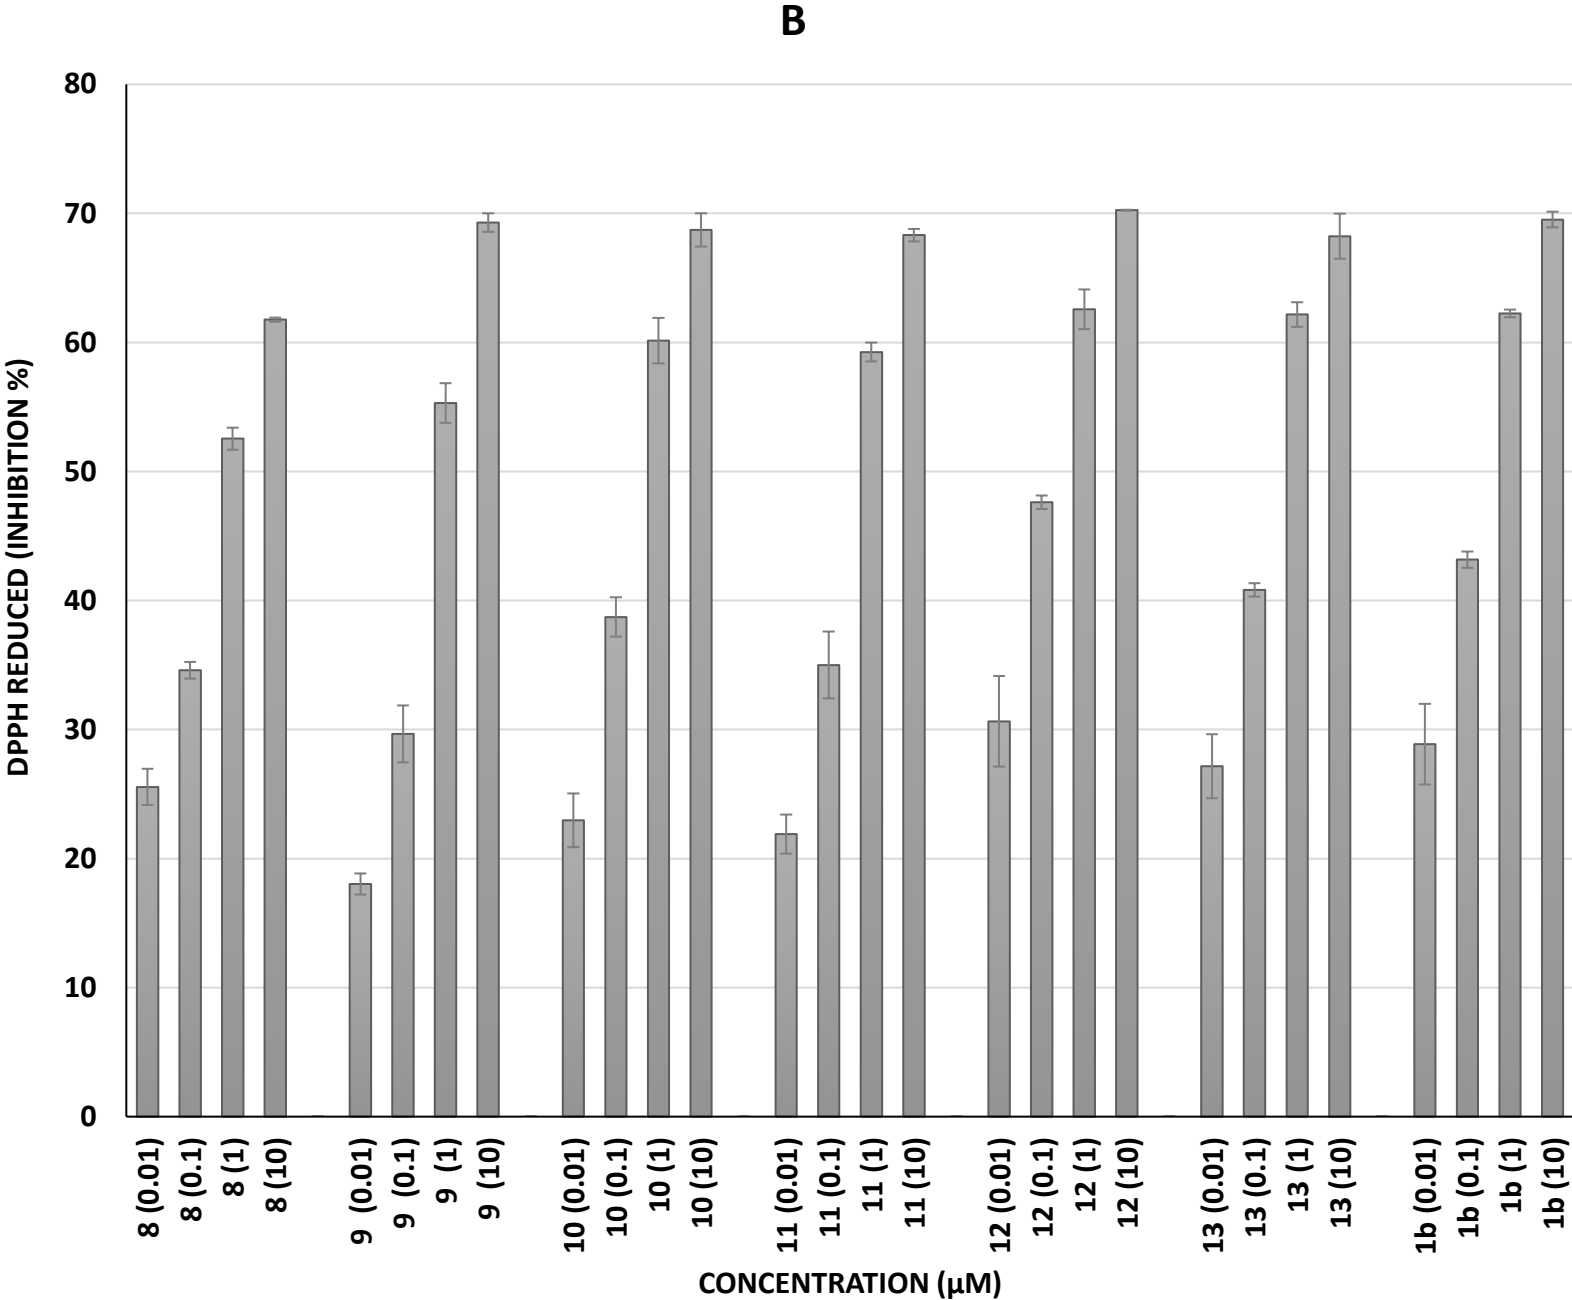

Fig. S2A

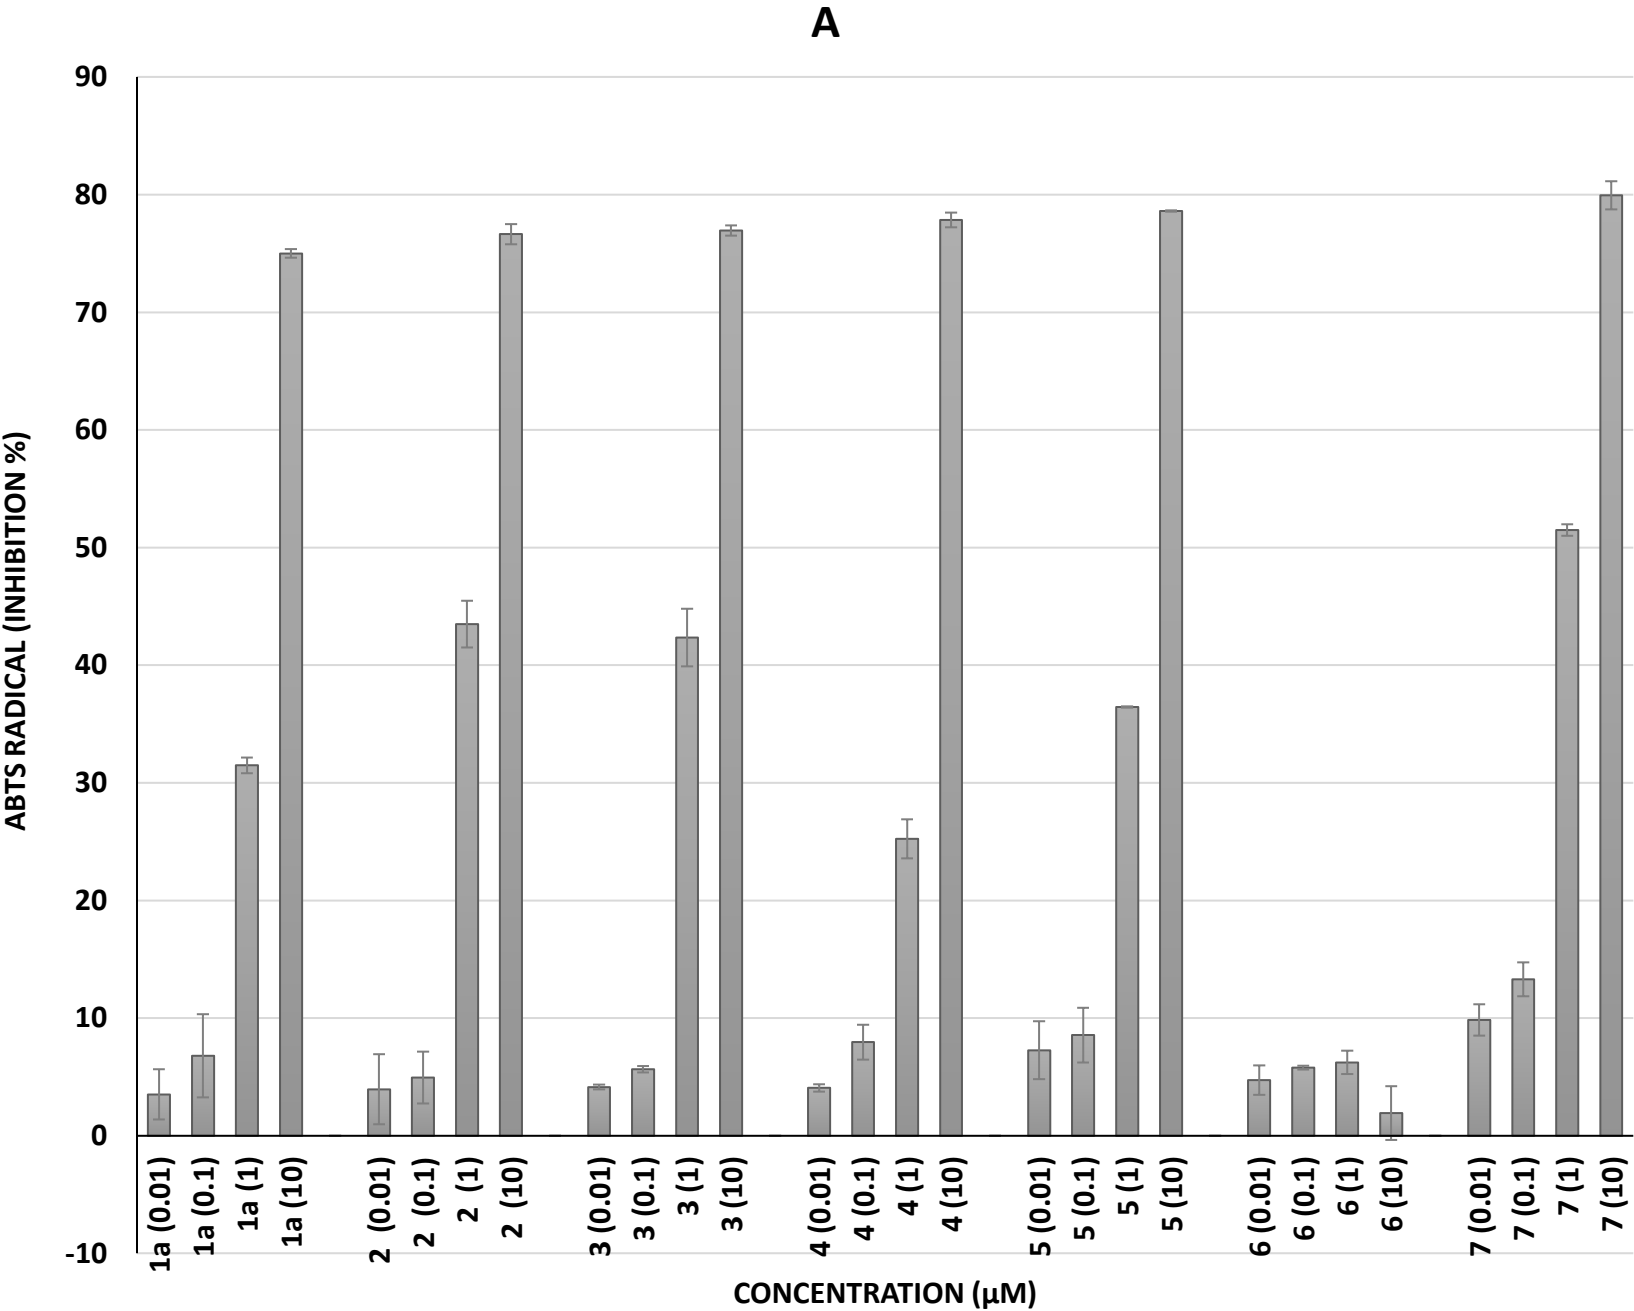

Fig. S2B

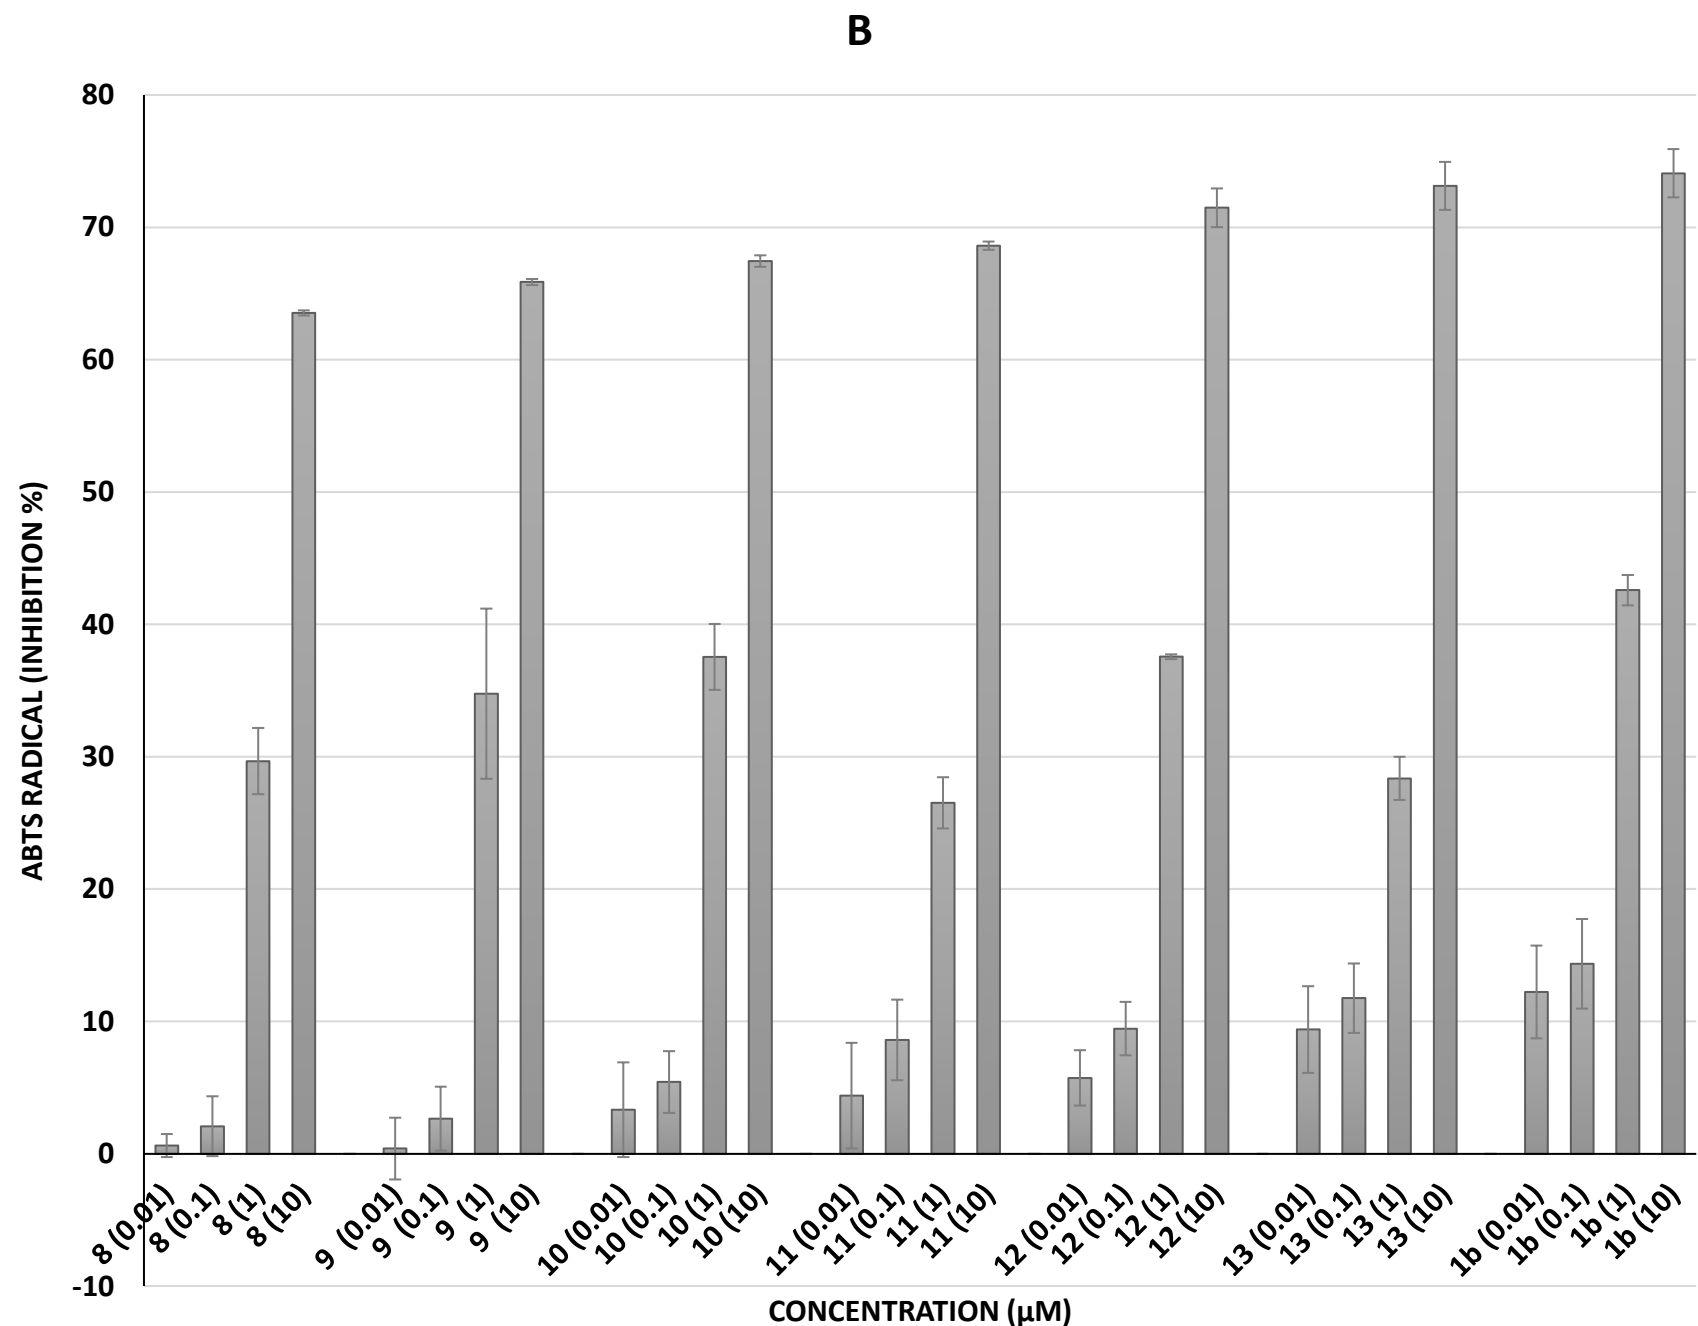

A

Fig. S3A

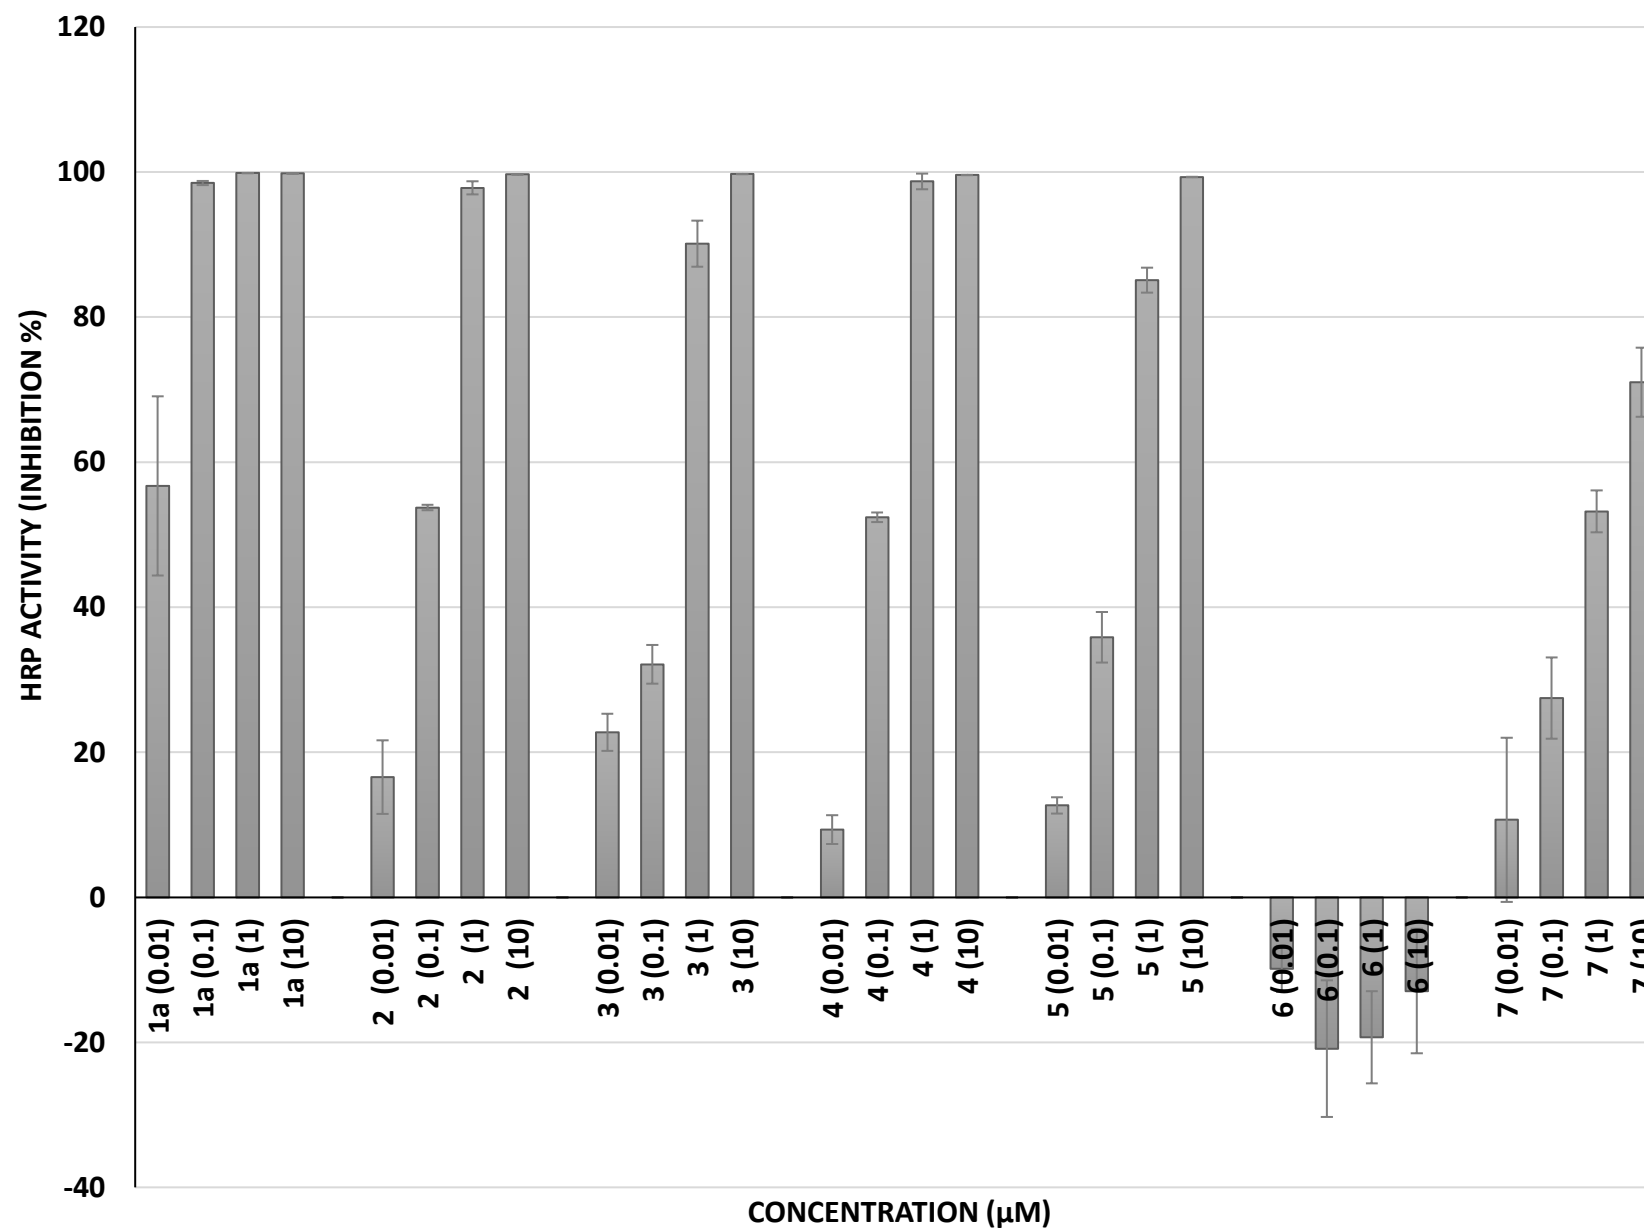

Fig. S3B

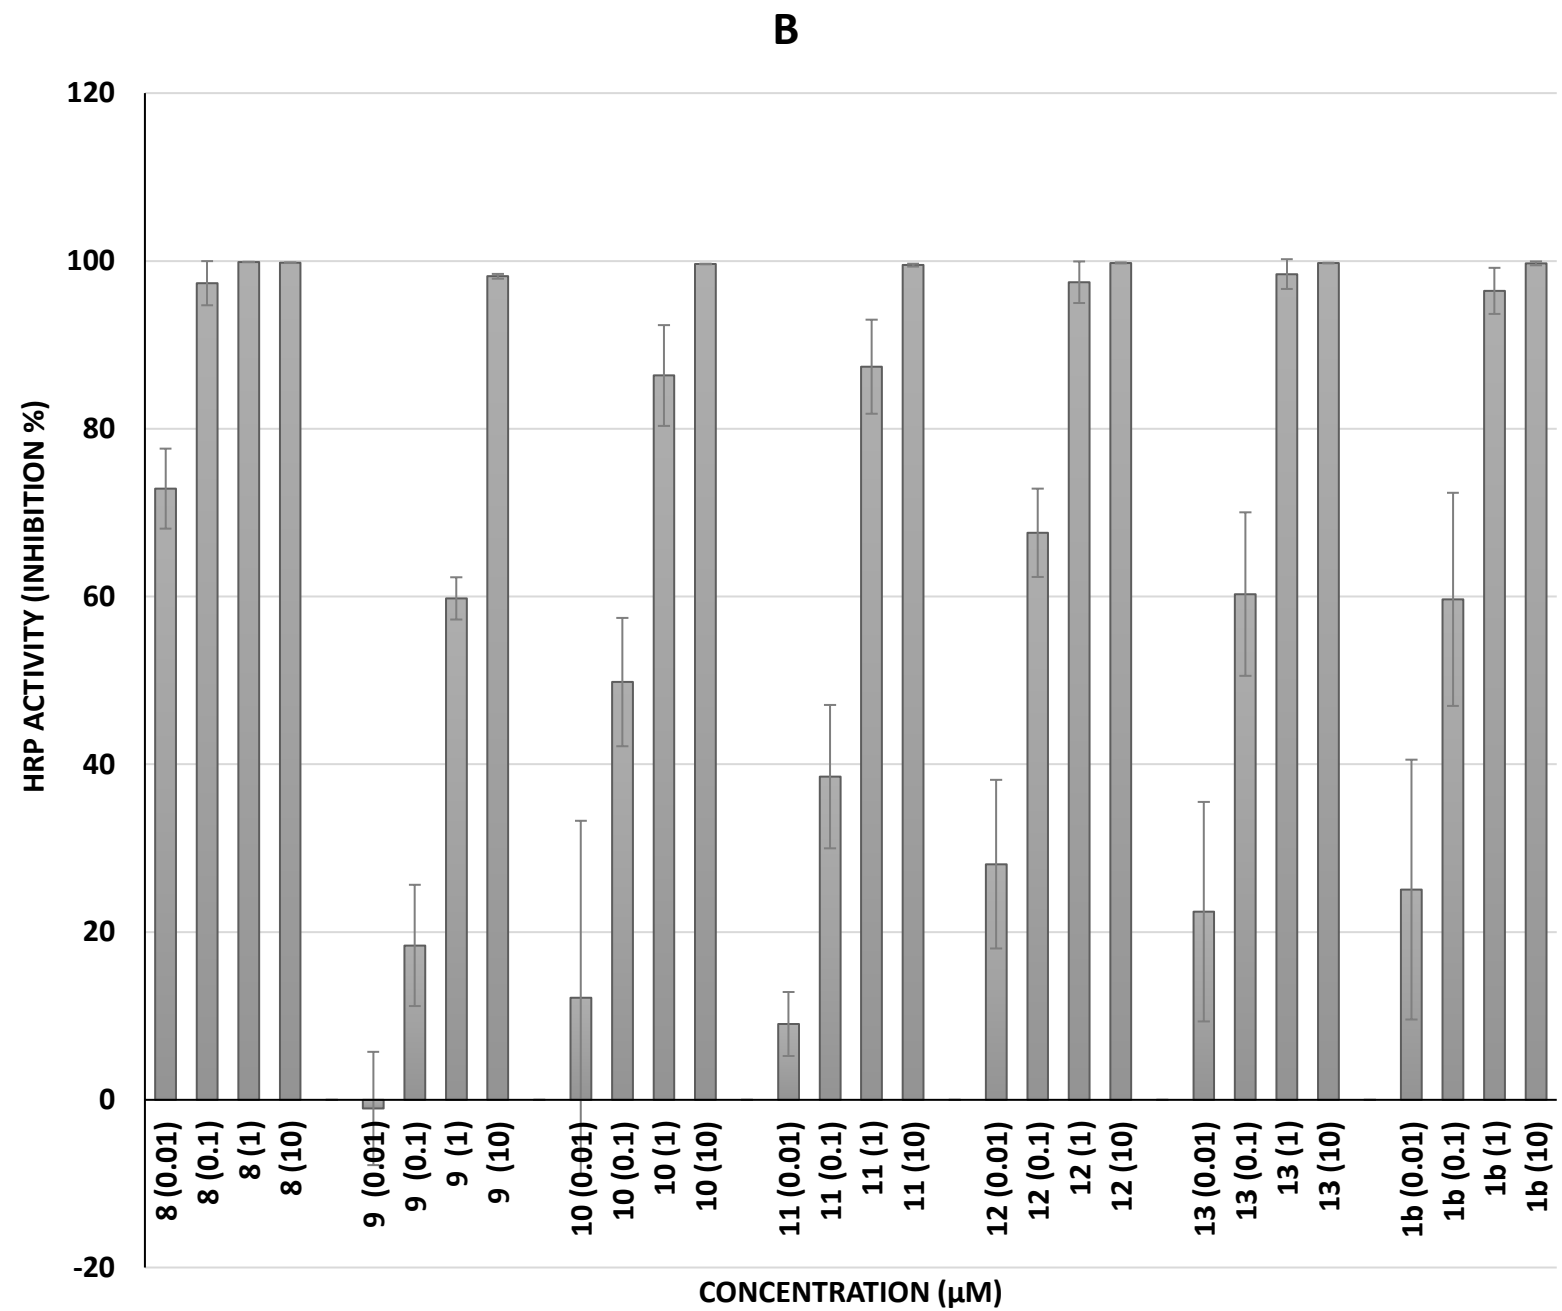

**Supplementary material:** Synthesis of Methyl 2-ethoxy-7-hydroxybenzo[*d*][1,3]dioxole-5-carboxylate (**y** = **Protected methyl gallate, 11**).

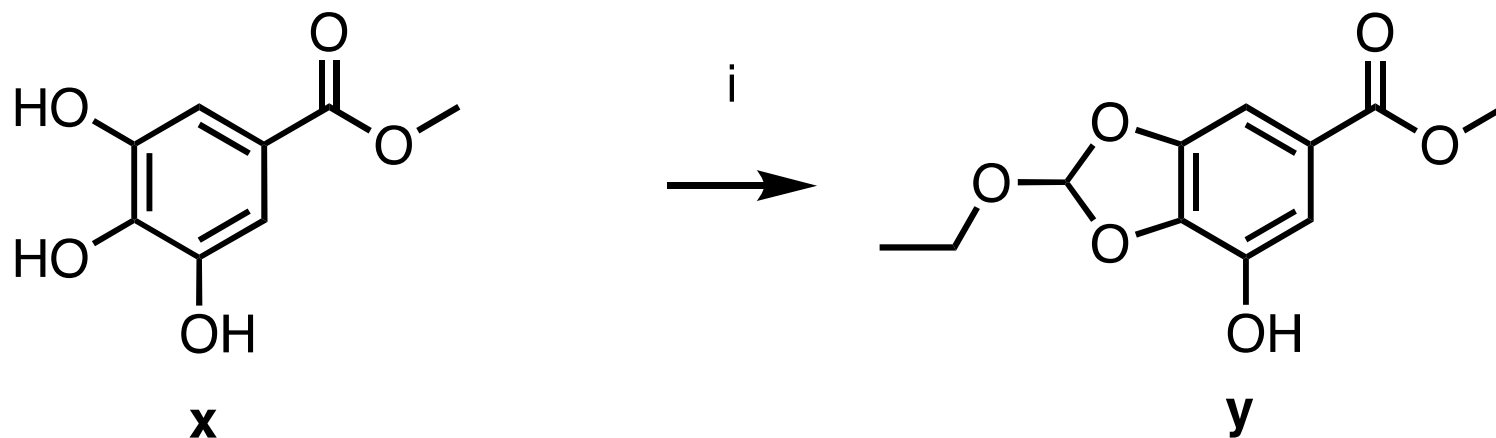

Scheme A. i:  $\text{HC}(\text{OEt})_3$ ,  $160^\circ\text{C}$ .

A mixture of methyl 3,4,5-trihydroxybenzoate (**x**, 5.00 g, 27.2 mmol) in triethylorthoformate (5.0 ml) is heated under stirring in an open vessel at  $160^\circ\text{C}$ . After 4 hours, the mixture is cooled down and evaporated under vacuo. The residue is crystallised in toluene. The obtained crystals are washed with hexane to yield **y** (3.44 g, 14.3 mmol, 52.7%). Elemental analysis: C 55.14 (55.00), H 5.05 (5.04).  $^1\text{H}$  NMR (500 MHz, DMSO)  $\delta$  10.27 (s, 1H, Ar-OH), 7.19 (d,  $J = 1.6$  Hz, 1H, 6-*H*), 7.17 (s, 1H, C-*H*), 7.01 (d,  $J = 1.6$  Hz, 1H, 4-*H*), 3.79 (s, 3H,  $\text{CH}_3$ ), 3.70 (q,  $J = 7.1$  Hz, 2H,  $\text{CH}_2\text{CH}_3$ ), 1.17 (t,  $J = 7.1$  Hz, 3H,  $\text{CH}_2\text{CH}_3$ ).
